# Supplementary material for: Technical note: In situ measurement of flux and isotopic composition of CO 2 released during oxidative weathering of sedimentary rocks
Source: Copernicus journal article supplement (doi:10.5194/bg-15-4087-2018), 2018-07-04
Supplement: Supplementary file [file bg-15-4087-2018-supplement-title-page.pdf › bg-15-4087-2018-supplement-title-page.pdf]

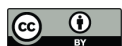

## *Supplement of*

# **Technical note: In situ measurement of flux and isotopic composition of CO<sub>2</sub> released during oxidative weathering of sedimentary rocks**

**Guillaume Soulet et al.**

*Correspondence to:* Guillaume Soulet ([guillaume.s.soulet@durham.ac.uk](mailto:guillaume.s.soulet@durham.ac.uk))

- [bg-15-4087-2018-supplement-title-page.pdf](#)
- [Data\\_H6\\_27032017-R2](#)
  - [Flux\\_exp\\_model\\_results\\_H6\\_27032017.csv](#)
  - [Raw\\_data\\_H6\\_27032017.csv](#)
  - [Flux\\_exp\\_model\\_results\\_H6\\_27032017\\_R2\\_mgm2day.xlsx](#)

The copyright of individual parts of the supplement might differ from the CC BY 4.0 License.
